# Supplementary material for: Phosphorus Release Dynamics from Ashes during a Soil Incubation Study: Effect of Feedstock Characteristics and Combustion Conditions
Source: MDPI journal article supplement (doi:10.3390/agronomy14050935), 2024-04-30
Supplement: s1 [file s1]

## **SUPPLEMENTARY MATERIAL**

### **Phosphorus release dynamics from ashes during a soil incubation study: effect of feedstock characteristics and combustion conditions**

Berta Singla Just<sup>1x</sup>, Pablo M. Binder<sup>1x\*</sup>, Nagore Guerra Gorostegui<sup>1</sup>, Laura Díaz-Guerra<sup>1</sup>, Rosa Vilaplana<sup>1</sup>, Nicola Frison<sup>2</sup>, Erik Meers<sup>3</sup>, Laia Llenas<sup>1</sup>, Ana Robles Aguilar<sup>1</sup>

<sup>x</sup> These authors contributed to the manuscript equally as first authors

<sup>1</sup> BETA Tech. Center (TECNIO Network). University of Vic - Central University of Catalonia (UVic-UCC),

Carretera de Roda 70, 08500 Vic, Spain

<sup>2</sup> Department of Biotechnology, University of Verona, Verona, 37134, Italy

<sup>3</sup> Department of Green Chemistry and Technology, Ghent University, Ghent, 9000, Belgium

\*Corresponding author: Pablo Martin (ORC ID 0000-0001-5137-2443)

Tel.: +34 938816168 ext 8426

E-Mail: [pablomartin.binder1@uvic.cat](mailto:pablomartin.binder1@uvic.cat)

Table S1: mean P release (%) and standard deviation (SD ) of four replicates for each treatment during the soil incubation. It is pertinent to note that the mean values were calculated after excluding outliers.

| Treatment | Day 5     |          |      | Day 10    |          |      | Day 20    |          |      | Day 40    |          |      | Day 60    |          |      | Day 80    |          |      | Day 100   |          |      | Day 120   |          |      | Day 140   |          |      | Day 160   |          |      |
|-----------|-----------|----------|------|-----------|----------|------|-----------|----------|------|-----------|----------|------|-----------|----------|------|-----------|----------|------|-----------|----------|------|-----------|----------|------|-----------|----------|------|-----------|----------|------|
|           | P rel (%) | Mean (%) | SD   | P rel (%) | Mean (%) | SD   | P rel (%) | Mean (%) | SD   | P rel (%) | Mean (%) | SD   | P rel (%) | Mean (%) | SD   | P rel (%) | Mean (%) | SD   | P rel (%) | Mean (%) | SD   | P rel (%) | Mean (%) | SD   | P rel (%) | Mean (%) | SD   | P rel (%) | Mean (%) | SD   |
| TSP       | 93.3      | 110.0    | 19.9 | 108.3     | 117.7    | 19.6 | 83.7      | 87.6     | 4.5  | 374.8     | 105.9    | 17.3 | 144.8     | 158.5    | 21.7 | 88.0      | 87.8     | 3.9  | 251.9     | 188.9    | 48.4 | 99.3      | 108.2    | 22.3 | 131.8     | 132.1    | 13.7 | 107.8     | 119.7    | 11.4 |
|           | 138.8     |          |      | 139.9     |          |      | 86.7      |          |      | 93.7      |          |      | 186.6     |          |      | 82.2      |          |      | 142.1     |          |      | 99.3      |          |      | 157.4     |          |      | 130.6     |          |      |
|           | 101.4     |          |      | 95.5      |          |      | 85.9      |          |      | 35.1      |          |      | 164.1     |          |      | 90.3      |          |      | 200.2     |          |      | 92.9      |          |      | 103.0     |          |      | 120.8     |          |      |
|           | 106.5     |          |      | 127.1     |          |      | 94.0      |          |      | 118.1     |          |      | 138.4     |          |      | 90.7      |          |      | 161.5     |          |      | 141.3     |          |      | 136.0     |          |      | 73.6      |          |      |
| PM550     | 49.3      | 51.6     | 8.8  | 38.0      | 41.8     | 11.5 | 42.5      | 46.4     | 6.4  | 84.3      | 66.5     | 15.8 | 54.4      | 63.8     | 6.8  | 59.4      | 38.9     | 15.0 | 30.9      | 45.7     | 10.5 | 23.5      | 54.2     | 35.1 | 47.6      | 63.5     | 23.7 | 57.1      | 50.1     | 9.8  |
|           | 41.7      |          |      | 58.1      |          |      | 180.5     |          |      | 63.0      |          |      | 67.0      |          |      | 28.4      |          |      | 53.8      |          |      | 68.6      |          |      | 116.4     |          |      | 60.0      |          |      |
|           | 52.6      |          |      | 31.2      |          |      | 42.8      |          |      | 46.8      |          |      | 63.8      |          |      | 40.7      |          |      | 45.9      |          |      | 27.5      |          |      | 52.1      |          |      | 41.4      |          |      |
|           | 62.9      |          |      | 39.8      |          |      | 53.7      |          |      | 72.0      |          |      | 70.1      |          |      | 27.0      |          |      | 52.2      |          |      | 97.1      |          |      | 90.8      |          |      | 42.0      |          |      |
| PMW550    | 20.0      | 40.5     | 22.5 | 31.2      | 39.3     | 7.5  | 36.8      | 41.0     | 13.1 | 42.5      | 40.5     | 6.7  | 32.3      | 44.7     | 32.5 | 11.4      | 21.0     | 10.0 | 45.1      | 44.9     | 10.5 | 29.9      | 26.3     | 4.5  | 130.0     | 57.4     | 2.0  | 23.8      | 25.5     | 3.7  |
|           | 36.9      |          |      | 46.2      |          |      | 30.6      |          |      | 37.4      |          |      | 92.9      |          |      | 19.1      |          |      | 51.4      |          |      | 20.4      |          |      | 24.3      |          |      | 22.3      |          |      |
|           | 64.6      |          |      | 116.4     |          |      | 60.3      |          |      | 33.3      |          |      | 22.1      |          |      | 35.0      |          |      | 30.1      |          |      | 29.9      |          |      | 56.0      |          |      | 30.8      |          |      |
|           | 470.5     |          |      | 40.4      |          |      | 36.5      |          |      | 48.9      |          |      | 31.5      |          |      | 18.4      |          |      | 53.0      |          |      | 25.1      |          |      | 58.9      |          |      | 25.0      |          |      |
| SD850     | 35.9      | 75.5     | 26.5 | 85.5      | 143.5    | 79.4 | 101.7     | 116.1    | 71.4 | 6.4       | 58.8     | 35.1 | 81.9      | 96.5     | 44.3 | 86.4      | 96.9     | 19.1 | 72.0      | 81.9     | 14.2 | 70.2      | 80.5     | 19.6 | 91.8      | 122.1    | 67.1 | 116.1     | 84.0     | 28.1 |
|           | 86.6      |          |      | 70.6      |          |      | 73.7      |          |      | 70.7      |          |      | 55.1      |          |      | 124.1     |          |      | 70.4      |          |      | 109.8     |          |      | 98.6      |          |      | 50.0      |          |      |
|           | 87.0      |          |      | 179.8     |          |      | 220.9     |          |      | 81.2      |          |      | 89.8      |          |      | 96.1      |          |      | 101.3     |          |      | 68.6      |          |      | 221.7     |          |      | 75.5      |          |      |
|           | 92.4      |          |      | 237.8     |          |      | 68.1      |          |      | 76.8      |          |      | 159.0     |          |      | 81.1      |          |      | 83.9      |          |      | 73.4      |          |      | 76.1      |          |      | 94.7      |          |      |
| DW550     | 65.6      | 62.6     | 7.2  | 92.8      | 65.1     | 20.7 | 51.0      | 57.4     | 11.3 | 59.9      | 55.5     | 8.4  | 59.1      | 54.2     | 7.8  | 40.2      | 47.2     | 8.5  | 41.9      | 45.9     | 4.6  | 51.2      | 50.8     | 6.5  | 53.0      | 51.8     | 8.2  | 67.6      | 72.6     | 7.5  |
|           | 54.6      |          |      | 68.5      |          |      | 65.8      |          |      | 47.1      |          |      | 52.0      |          |      | 59.0      |          |      | 49.0      |          |      | 45.7      |          |      | 47.2      |          |      | 65.1      |          |      |
|           | 71.0      |          |      | 53.5      |          |      | 44.8      |          |      | 65.0      |          |      | 44.1      |          |      | 41.6      |          |      | 41.9      |          |      | 59.9      |          |      | 44.2      |          |      | 76.9      |          |      |
|           | 59.3      |          |      | 45.7      |          |      | 68.0      |          |      | 50.0      |          |      | 61.4      |          |      | 48.1      |          |      | 50.6      |          |      | 46.5      |          |      | 62.9      |          |      | 80.7      |          |      |
| MD550     | 67.9      | 66.5     | 10.8 | 41.8      | 69.1     | 20.3 | 62.9      | 83.0     | 47.5 | 44.5      | 110.5    | 88.5 | 57.5      | 56.3     | 16.6 | 55.9      | 53.3     | 16.9 | 164.6     | 85.4     | 54.3 | 36.2      | 45.1     | 9.4  | 50.2      | 66.4     | 19.0 | 65.6      | 71.2     | 19.6 |

|      |      |       |       |      |      |      |      |      |      |
|------|------|-------|-------|------|------|------|------|------|------|
| 64.8 | 90.9 | 37.5  | 76.2  | 59.9 | 37.0 | 41.1 | 52.8 | 57.4 | 46.1 |
| 53.5 | 71.0 | 83.1  | 241.0 | 74.0 | 75.9 | 71.2 | 53.6 | 93.6 | 83.1 |
| 79.7 | 72.6 | 148.6 | 80.3  | 33.9 | 44.4 | 64.9 | 37.8 | 64.4 | 90.0 |

---
